Anesthesiology  
1996; 84:782-8  
© 1996 American Society of Anesthesiologists, Inc.  
Lippincott-Raven Publishers

## Interaction of Isoflurane and Nitrous Oxide Combinations Similar for Median Electroencephalographic Frequency and Clinical Anesthesia

Heiko Röpcke, M.D.\* Helmut Schwilden, M.D. Ph.D.†

**Background:** The volatile anesthetic sparing effect of nitrous oxide in clinical studies is less than might be expected from the additivity of minimum alveolar concentration values. Other studies identify nonadditive interactions between isoflurane and nitrous oxide. The aim of this study was to quantify the interaction of isoflurane and nitrous oxide at a constant median electroencephalographic frequency.

**Methods:** Twenty-five patients were studied during laparotomies. Nitrous oxide was randomly administered in concentrations of 0, 20, 40, 60, and 75 vol%, to ten patients for each nitrous oxide concentration. Isoflurane vaporizer settings were chosen so that the median electroencephalographic frequency was held between 2 and 3 Hz. The relationship between nitrous oxide concentrations and required isoflurane concentrations was examined with the method of isoboles.

**Results:** Nitrous oxide linearly decreased the isoflurane requirement. Addition of every 10 vol% of nitrous oxide decreases the isoflurane requirement by approximately 0.04 vol%. The total anesthetic requirement of isoflurane and nitrous oxide, expressed in terms of previously reported minimum alveolar concentration values, increased significantly with increasing nitrous oxide concentrations.

**Conclusions:** The interaction of isoflurane and nitrous oxide in the dose range 0-75 vol% on median electroencephalographic frequency is compatible with additivity. The potency of nitrous oxide as a substitute for isoflurane is less than on a minimum alveolar concentration basis. Maintaining median electroencephalographic frequency more appropriately reflects the clinical usage of isoflurane and nitrous oxide than does maintaining minimum alveolar concentration. (Key words: Anesthetics, gases: nitrous oxide. Anesthetics, volatile: isoflurane. Brain: electroencephalography. Interactions, drug:

isoflurane/nitrous oxide. Monitoring: electroencephalography. Potency: anesthetic.)

THE minimum alveolar concentration (MAC) of a single volatile anesthetic<sup>1</sup> necessary to suppress movement to skin incision of 50% of patients, serves as a measure to compare the potencies of inhalational anesthetics. Clinical anesthesia most often uses a combination of nitrous oxide and a volatile agent. Nitrous oxide is well documented to decrease the requirement of volatile anesthetics necessary to suppress the response to skin incision.

It has been shown that the interaction between nitrous oxide and volatile agents such as halothane, enflurane, or isoflurane, is additive in the sense that the linear combination of two MAC fractions of nitrous oxide and the volatile agent totaling 1.0 MAC also suppresses skin incision in 50% of the patients.<sup>2-4</sup> The additivity of MAC supports the "unitary theory of narcosis" that asserts that all anesthetics act in the same way. This theory suggests an identity of action at the molecular level.<sup>5</sup>

Recent studies by Cole *et al.* claimed to have shown a nonlinear contribution to the interaction of nitrous oxide with halothane, enflurane, and isoflurane in rats.<sup>6,7</sup> Chortkoff *et al.* examined the ED<sub>50</sub> for suppression of learning and the ability to respond appropriately to verbal command using the combination of isoflurane plus 40 vol% nitrous oxide.<sup>8</sup> For both ED<sub>50</sub>s, a slightly higher value is reported than predicted by assumption of additivity. A study by Yli-Hankala *et al.* showed that the addition of nitrous oxide to isoflurane decreases the frequency and duration of isoflurane-induced burst suppressions in the electroencephalogram (EEG) in a manner indicating a nonadditive interaction.<sup>9</sup>

The type and degree of interaction between two anesthetics also depend on the clinical end point used. Deady *et al.* demonstrated that the ratios of anesthetic

\* Staff Anesthesiologist.

† Professor of Clinical Pharmacology in Anesthesia.

Received from the Department of Anesthesiology, University of Bonn, Germany. Submitted for publication December 20, 1994. Accepted for publication December 6, 1995. Presented in part at the annual meeting of the American Society of Anesthesiologists, Washington, D.C., October 9-13, 1993.

Address reprint requests to Dr. Röpcke: Department of Anesthesiology, University of Bonn, Sigmund Freud Strasse 25, 53105 Bonn, Germany.

concentration to maintain tail-clamp stimulation. The concentration to maintain the tail-clamp stimulation differs for isoflurane, enflurane, and halothane. These findings do not support the unitary theory of action. Instead, right tail-clamp test or heat tail-clamp test mechanisms.

The aim of this study was to determine the effect of nitrous oxide on the median electroencephalographic frequency. The rationale for this study has shown that median EEG frequency of 3 Hz are associated with anesthesia.<sup>11,12</sup> In addition, anesthesia with isoflurane at 1.3 MAC averaged 2.5 Hz during surgery.

### Methods

After approval by the institutional review board, informed consent was obtained from the patients, ASA physical status I-II, scheduled for gynecologic surgery. Patients with a history of asthma, hypertension, or other chronic disease had received no drugs within 24 hours before surgery. A 30 mg bolus of alfentanil and 3 mg of fentanyl were administered for analgesia. The patient was intubated, anesthetized with isoflurane and nitrous oxide. The lungs were ventilated with 35 mmHg carbon dioxide. The patient was monitored noninvasively with a Criticare Monitor (Criticare Systems, Inc., Esophageal temperature). The effects of the induction of anesthesia, a constant level of anesthesia, were to be reduced.

One EEG lead (frontal) was used (10-20 system) (many) was used. The signal was filtered

## INTERACTION OF ISOFLURANE AND NITROUS OXIDE ON THE EEG

concentration to maintain upright position to response to tail-clamp stimulus and the ratios of anesthetic concentration to maintain upright position to heat applied to the tail differs for the anesthetics nitrous oxide, isoflurane, enflurane, and halothane in mice.<sup>10</sup> Their findings do not support a unitary mechanism of anesthetic action. Instead, righting reflex and response to tail-clamp test or heat test seem to be depressed by different mechanisms.

The aim of this study was to quantify the interaction of nitrous oxide and isoflurane while maintaining a constant level of cortical activity as indicated by a median EEG frequency between 2 and 3 Hz during surgery. The rationale for this target range is that earlier work has shown that median EEG frequencies between 2 and 3 Hz are associated with reasonable planes of anesthesia.<sup>11,12</sup> In addition, it has been shown that during anesthesia with isoflurane and 60 vol% nitrous oxide at 1.3 MAC average median EEG frequency was around 2.5 Hz during surgery.<sup>13</sup>

### Methods

After approval by the local Ethics Committee, written informed consent was obtained from 25 female patients, ASA physical status 1 or 2, aged  $39 \pm 8$  yr, scheduled for gynecologic laparotomies. Not included were patients with apparent neurologic deficit, hypothyroidism or hyperthyroidism, pregnancy, or patients who had received drugs affecting central neurotransmitter release. Patients received 7.5 mg oral midazolam 2 h before surgery. Anesthesia was induced with 0.5 mg alfentanil and 3 mg/kg thiopental. Vecuronium was administered for neuromuscular block and no anticholinergic agent was used. Once the trachea had been intubated, anesthesia was maintained with isoflurane and nitrous oxide. In addition to nitrous oxide, patients' lungs were ventilated with oxygen and air. End-tidal carbon dioxide tension was monitored and kept constant at 35 mmHg. Blood pressure and heart rate were measured noninvasively with a Dinamap Vital Daten Monitor (Criticon, Tampa, FL) at intervals of 3 min. Esophageal temperature was monitored. After induction of anesthesia, a 60-min waiting period allowed the effects of the induction doses of thiopental and alfentanil to be reduced.

One EEG lead in F<sub>3</sub> and P<sub>3</sub> position (international 10–20 system) (Sirecust 404, Siemens, Erlangen, Germany) was used for on-line signal analysis. The raw signal was filtered between 0.5 and 32 Hz and divided

into epochs of 8.192 s duration, which were digitized at a rate of 125 Hz. The median EEG frequency (50% quantile of the power spectrum) and the percentage of activity in the frequency bands 0.5–2, 2–5, 5–8, 8–13, and 13–32 Hz were calculated. A moving average over seven epochs was used for data smoothing. End-tidal isoflurane concentrations were measured by a Normac anesthetic gas analyzer (Datex, Copenhagen, Denmark). For each patient, the analyzer was calibrated without any anesthetic and with a standard concentration of volatile anesthetic. For each EEG epoch, the corresponding end-tidal isoflurane concentration was determined.

The target range for median EEG frequency was chosen as 2–3 Hz. If median EEG frequency was greater than 3 Hz isoflurane vaporizer settings were increased by 20%, if median EEG frequency was lower than 2 Hz isoflurane vaporizer settings were decreased by 20%.

Required isoflurane concentration was defined as the mean end-tidal isoflurane concentration over a period of 15 min. During a period of 15 min, we determined 110 values of end-tidal isoflurane concentration (1 value for each 8.192 s EEG epoch). If the corresponding median EEG frequencies were out of the range of 2–3 Hz these values for measured end-tidal isoflurane concentration were rejected.

The mean of the median EEG frequencies of all 110 epochs was used as an indicator of the adequacy of isoflurane dosage. Deviation from the mean of the target range (2.5 Hz) would indicate too high or too low levels of isoflurane administration.

The standard deviation of the 110 values of end-tidal isoflurane concentrations was used as an indicator of the constancy of end-tidal isoflurane concentrations.

Nitrous oxide was randomly administered in concentrations of 0, 20, 40, 60, and 75 vol%, each concentration was given to ten patients ( $n = 10$  for each concentration), each patient received two different nitrous oxide concentrations. The measurement periods were allocated during surgical stimulation between opening and closure of the peritoneum. A period of 30 min for equilibration of nitrous oxide and isoflurane was allowed after the nitrous oxide change and before a second measurement period.

The hypothesis of additivity between the two anesthetic agents was tested with the method of isoboles.<sup>14</sup> For each concentration of nitrous oxide, we measured the required concentration of isoflurane necessary to maintain the median EEG frequency between 2 and 3 Hz. Additivity is present if all pairs of concentrations



**Table 1. Age, Temperature, Median Electroencephalographic Frequency, Required End-tidal Isoflurane Concentrations, and Total Anesthetic Requirement for Different Nitrous Oxide Concentrations**

| Nitrous Oxide (vol %) | Age (yr)   | Temperature (°C) | Median EEG Frequency (Hz) | Mean of Required End-tidal Isoflurane (vol %) | Mean of Standard Deviations of Required End-tidal Isoflurane (vol %) | Total Anesthetic Requirement (MAC) |
|-----------------------|------------|------------------|---------------------------|-----------------------------------------------|----------------------------------------------------------------------|------------------------------------|
| 0                     | 38.4 ± 8.0 | 35.7 ± 0.6       | 2.51 ± 0.12               | 1.06 ± 0.24                                   | 0.11                                                                 | 0.92 ± 0.21                        |
| 20                    | 40.9 ± 9.3 | 35.7 ± 0.6       | 2.47 ± 0.08               | 1.04 ± 0.25                                   | 0.07                                                                 | 1.09 ± 0.22                        |
| 40                    | 37.3 ± 6.4 | 35.9 ± 0.5       | 2.45 ± 0.06               | 0.87 ± 0.27                                   | 0.11                                                                 | 1.14 ± 0.23                        |
| 60                    | 38.0 ± 9.4 | 35.6 ± 0.7       | 2.48 ± 0.10               | 0.77 ± 0.15                                   | 0.10                                                                 | 1.24 ± 0.13                        |
| 75                    | 38.7 ± 9.7 | 35.7 ± 0.5       | 2.46 ± 0.07               | 0.79 ± 0.23                                   | 0.10                                                                 | 1.41 ± 0.20                        |

Values are mean ± SD.

of both agents ( $C_{\text{isoflurane}}$ ,  $C_{\text{nitrous oxide}}$ ) that lead to the same effect obey the equation

$\alpha \times C_{\text{isoflurane}} + \beta \times C_{\text{nitrous oxide}} = 1$  with suitable coefficients  $\alpha > 0$  and  $\beta > 0$ .

Thus, additive interaction is present if data points lie on a straight line. Deviations from linearity indicate a nonadditive interaction.

Differences in age, temperature, and median EEG frequency in the groups of different nitrous oxide concentrations were tested with analysis of variance. Regression analysis was used to quantify the nature and strength of the relationship between nitrous oxide concentrations and end-tidal isoflurane concentrations, necessary to maintain median EEG frequency between 2 and 3 Hz, and the relationship between blood pressure, heart rate, and nitrous oxide concentrations. Regression analysis was used to determine whether nitrous oxide influenced isoflurane requirement differently at the first and second measurement periods. Statistical significance was assumed at probability levels of  $\leq 0.05$ .

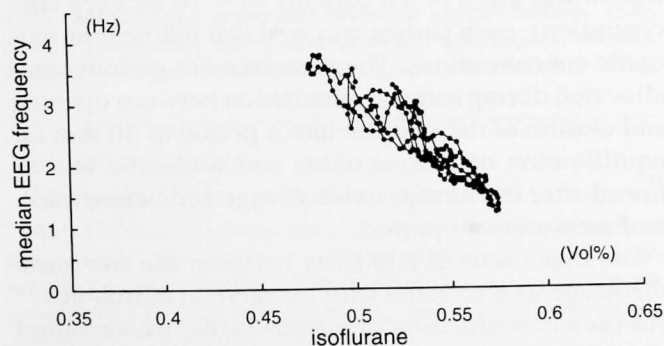

**Fig. 1. Relationship between isoflurane concentration and median electroencephalographic frequency after hysteresis elimination for patient 1 receiving 75 vol% nitrous oxide.**

## Results

Age and temperature did not differ between the groups receiving the various nitrous oxide concentrations (table 1).

Figure 1 depicts as an example the relationship between isoflurane concentration and median EEG frequency for one subject. The hysteresis between end-tidal isoflurane concentrations and median EEG frequency was eliminated, using the concept of effect compartments.

At a constant median EEG frequency of 2.5 Hz, the nitrous oxide concentrations did not influence the pattern of EEG, as depicted in figure 2. In addition, analysis of variance showed no significant difference in the percentage of activity in the EEG frequency bands between the various nitrous oxide concentrations (table 2).

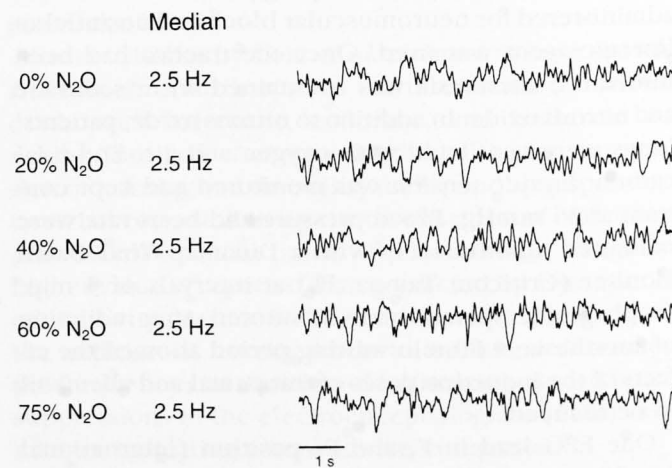

**Fig. 2. Raw electroencephalograms of five typical patients with isoflurane/nitrous oxide anesthesia when median electroencephalographic frequency reached 2.5 Hz.**

The mean of all ten patients of each significantly between concentrations (table

Figure 3 depicts isoflurane concentration frequency between 2 oxide concentration formed by fitting 1 isoflurane concentration nitrous oxide concentration estimation was for regression was calculated

$$C_{\text{isoflurane}} = 1.05$$

The probability isoflurane concentration (slope  $\neq 0$ ) is 0 -0.93, R-squared is 0.05.

No statistically between the nitrous and second measurement

If the total anesthetic sum of isoflurane and nitrous oxide assuming 1.0 MAC of nitrous oxide is a significant interaction multiples with interaction (fig. 4).

No significant diastolic blood pressure and various nitrous oxide concentrations (table 2).

## Discussion

The results of the concentration

**Table 2. Hemodynamic Parameters for Different Nitrous Oxide Concentrations**

| Nitrous Oxide (vol %) | BP <sub>sys</sub> (mmHg) | HR (b/min) |
|-----------------------|--------------------------|------------|
| 0                     | 110 ± 15                 | 70 ± 10    |
| 20                    | 110 ± 15                 | 70 ± 10    |
| 40                    | 110 ± 15                 | 70 ± 10    |
| 60                    | 110 ± 15                 | 70 ± 10    |
| 75                    | 110 ± 15                 | 70 ± 10    |

Values are mean ± SD. BP<sub>sys</sub> = systolic blood pressure.

## INTERACTION OF ISOFLURANE AND NITROUS OXIDE ON THE EEG

The mean of all median EEG frequencies from the ten patients of each nitrous oxide group did not differ significantly between the various nitrous oxide concentrations (table 1).

Figure 3 depicts the isobole of required end-tidal isoflurane concentrations to maintain the median EEG frequency between 2 and 3 Hz versus the chosen nitrous oxide concentrations. Regression analysis was performed by fitting linear and quadratic models relating isoflurane concentrations to independently chosen nitrous oxide concentrations. Lowest standard error of estimation was found for a linear model. The line of regression was calculated as:

$$C_{\text{isoflurane}} = 1.05 \text{ vol\%} - 0.0041 \times C_{\text{nitrous oxide}} \quad (1)$$

The probability level for dependence of the required isoflurane concentration on nitrous oxide concentration (slope  $\neq 0$ ) is 0.015. The correlation coefficient is  $-0.93$ , R-squared is 89.6%, standard error of estimation is 0.05.

No statistically significant differences were observed between the nitrous oxide administrations at the first and second measurement periods.

If the total anesthetic requirement is expressed as the sum of isoflurane and nitrous oxide MAC-fractions (assuming 1.0 MAC of isoflurane to be 1.15 vol% and 1.0 MAC of nitrous oxide to be 1.04 atm absolute) there is a significant increase in the total anesthetic MAC multiples with increasing nitrous oxide concentrations (fig. 4).

No significant difference in systolic blood pressure, diastolic blood pressure, and heart rate between the various nitrous oxide concentrations could be observed (table 2).

## Discussion

The results of this study are limited by the absence of the concentration of nitrous oxide alone, which leads

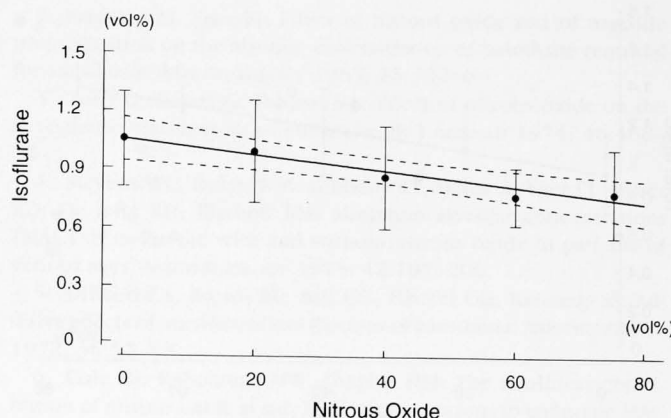

Fig. 3. Isobole of nitrous oxide concentrations versus required end-tidal isoflurane concentrations to maintain median electroencephalographic frequency between 2 and 3 Hz. Data points are mean  $\pm$  SD. — Regression line. --- 95% Confidence limits.

to a median EEG frequency of 2–3 Hz during surgery. Nitrous oxide can be used as the sole anesthetic only in hyperbaric conditions. This is not practicable under clinical conditions. However, this study shows that nitrous oxide in the dose range 0–75 vol% linearly decreases the isoflurane requirement necessary to maintain median EEG frequency between 2 and 3 Hz during surgical operation. This is compatible with an additive type of interaction between nitrous oxide and isoflurane on median EEG frequency.

Cole *et al.* reported deviations from linearity of the interaction between nitrous oxide and halothane, enflurane, or isoflurane on MAC in rats.<sup>6,7</sup> The observed deviations, however, were judged as rather small,<sup>15</sup> so that clinical relevance may be questioned.

Isoboles do not always consistently exhibit one type of interaction throughout their course.<sup>14</sup> Therefore, we cannot conclude that the type of interaction will remain

Table 2. Hemodynamic Parameters and Electroencephalographic Frequency Bands for Different Nitrous Oxide Concentrations

| Nitrous Oxide (vol %) | BP <sub>sys</sub> (mmHg) | BP <sub>dia</sub> (mmHg) | HR (min <sup>-1</sup> ) | $\delta_1$ 0.5–2 Hz (%) | $\delta_2$ 2–5 Hz (%) | $\theta$ 5–8 Hz (%) | $\alpha$ 8–13 Hz (%) | $\beta$ 13–32 Hz (%) |
|-----------------------|--------------------------|--------------------------|-------------------------|-------------------------|-----------------------|---------------------|----------------------|----------------------|
| 0                     | 112 $\pm$ 4              | 66 $\pm$ 8               | 80 $\pm$ 15             | 47.1 $\pm$ 2.1          | 14.8 $\pm$ 2.7        | 13.7 $\pm$ 3.6      | 8.6 $\pm$ 4.7        | 1.9 $\pm$ 0.7        |
| 20                    | 113 $\pm$ 14             | 69 $\pm$ 13              | 80 $\pm$ 11             | 46.9 $\pm$ 2.7          | 15.6 $\pm$ 3.4        | 13.0 $\pm$ 2.5      | 7.9 $\pm$ 4.3        | 2.2 $\pm$ 0.9        |
| 40                    | 112 $\pm$ 15             | 73 $\pm$ 15              | 72 $\pm$ 8              | 46.8 $\pm$ 3.9          | 15.1 $\pm$ 4.2        | 12.0 $\pm$ 3.7      | 9.4 $\pm$ 4.7        | 3.0 $\pm$ 1.7        |
| 60                    | 112 $\pm$ 11             | 69 $\pm$ 11              | 77 $\pm$ 12             | 46.4 $\pm$ 3.1          | 16.8 $\pm$ 3.4        | 11.4 $\pm$ 3.8      | 6.8 $\pm$ 3.1        | 3.2 $\pm$ 1.0        |
| 75                    | 114 $\pm$ 15             | 71 $\pm$ 13              | 76 $\pm$ 15             | 46.6 $\pm$ 2.5          | 18.3 $\pm$ 3.7        | 10.8 $\pm$ 5.0      | 4.8 $\pm$ 2.1        | 3.1 $\pm$ 1.6        |

Values are mean  $\pm$  SD.

BP<sub>sys</sub> = systolic blood pressure; BP<sub>dia</sub> = diastolic blood pressure; HR = heart rate.

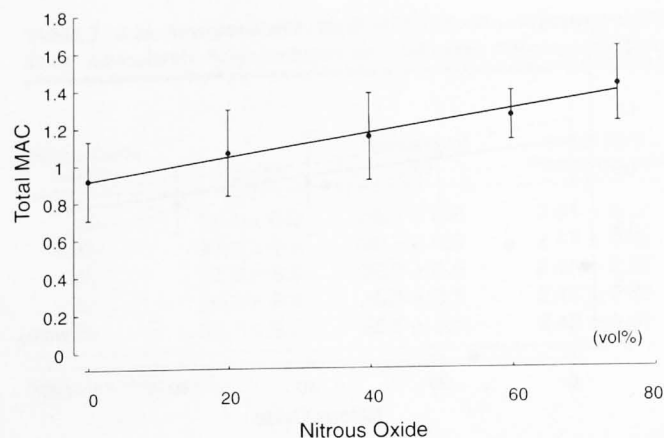

Fig. 4. Sum of fractional minimum alveolar concentration contributions (total minimum alveolar concentration) of nitrous oxide concentrations and required isoflurane concentrations to maintain median electroencephalographic frequency between 2 and 3 Hz. Data points are mean  $\pm$  SD. — Regression line.

additive at higher partial pressures of nitrous oxide then corresponding to 75 vol%.

The slope of isoboles can be used as an indicator of the potency of nitrous oxide to decrease the requirement of isoflurane. The potency of nitrous oxide to decrease the requirement of isoflurane necessary to keep median EEG frequency between 2 and 3 Hz is less than the potency of nitrous oxide to decrease the requirement of isoflurane necessary to suppress movement to skin incision in 50% of patients (MAC). Using equation (1), we can estimate that the addition of every 10 vol% of nitrous oxide decreases the isoflurane requirement as defined by the EEG criterion by approximately 0.04 vol%, while, in terms of MAC, each 10% of nitrous oxide decreases the isoflurane requirement by approximately 0.11 vol% (assuming additive interaction and MAC isoflurane, 1.15 vol%,<sup>4</sup> and MAC nitrous oxide, 1.04 atm absolute<sup>16</sup>; fig. 5).

We cannot exclude the possibility that our results are perturbed by acute tolerance by using subsequent measurement periods for each patient.<sup>17-20</sup> However, using regression analysis we could not identify an influence of nitrous oxide at the different measurement periods.

Other recent studies can be used to estimate the interaction of isoflurane and nitrous oxide when the level of clinical judgment or memory functions are considered (fig. 5). Eger *et al.* compared isoflurane anesthesia with and without 60% nitrous oxide for several kinds of surgeries.<sup>21</sup> Without nitrous oxide, the attending

anesthesiologist determined an average end-tidal concentration of 0.85 vol% isoflurane to be necessary for clinical anesthesia; 60 vol% nitrous oxide allowed a reduction of isoflurane to 0.64 vol%. Assuming a linear relationship, every 10% of nitrous oxide reduces the isoflurane requirement by 0.035 vol%. Eger *et al.* used lower levels of isoflurane than in our study. This could be explained by the coadministration of 0.23 mg fentanyl, which was not used in our study. In another study, Dwyer *et al.* determined the dose of isoflurane and nitrous oxide that suppressed memory by 50% (ED<sub>50</sub>).<sup>22</sup> The ED<sub>50</sub> was 0.2 MAC for isoflurane and 0.5 MAC for nitrous oxide. Assuming linear dependence, every 10 vol% of nitrous oxide decreases the isoflurane requirement by 0.045 vol%.

The differences in the potency of nitrous oxide to substitute isoflurane confirm the results of previous studies: the relative potencies of inhaled anesthetic agents depend on the end point measured.<sup>10,23,24</sup> These studies do not support the hypothesis that both anesthetics act in the same way. One possible explanation is that these anesthetics act at different anatomic sites. Whereas the EEG is known to represent the electrical activity of cortical structures, more recent studies suggest that MAC is a test of anesthetic potency that evaluates depression of a spinal reflex. Rampil *et al.* demonstrated that, with regard to MAC, the anesthetic potency of isoflurane is independent of forebrain structures of the rat.<sup>25</sup> They concluded that surgical

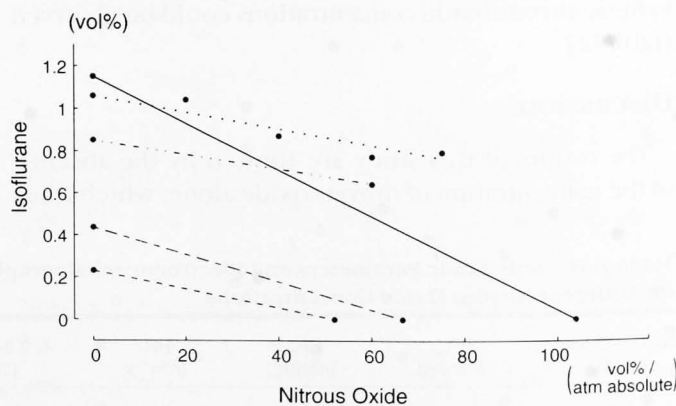

Fig. 5. Comparison of different studies used to estimate the interaction of isoflurane and nitrous oxide. — ED<sub>50</sub> for suppression of learning, Dwyer *et al.*<sup>22</sup> — Minimum alveolar concentration-awake, Dwyer *et al.*<sup>22</sup> . . . . Clinical signs, Eger *et al.*<sup>21</sup> — Minimum alveolar concentration, Stevens *et al.*<sup>4</sup> Hornbein *et al.*<sup>16</sup> . . . . Median electroencephalographic frequency 2-3 Hz (this study). Every point (•) represents the mean of a measurement.

unresponsiveness a  
determined by sub  
Rampil demonstrat  
T1 in rats does not  
sured MAC in goat  
flurane requirement  
when the brain was  
conclude, that sub  
ment in response  
anesthesia.

Quantitative EEG  
with isoflurane an  
showed dose-rela  
parison of EEG a  
stimulation showe  
could be that EEG  
noxious stimulation  
of anesthesia that  
actions.

The potency of  
flurane for clinical  
*al.*<sup>21</sup> is approxima  
this study. This s  
frequency better  
siologist consider  
than does the add

In spite of its an  
known to have o  
its high MAC val  
sole anesthetic a  
study of its intera  
indicates that the p  
for isoflurane is l  
MAC value. Thus  
oxide is an essen  
lational anesthe

In conclusion, t  
in the dose range  
requirement of i  
EEG frequency l  
interaction for th  
ticipated from M  
priately reflect th

## References

1. Quasha AL, Eger  
of MAC. ANESTHESIOLOGY

\* Rampil IJ: Is MA  
SIOLOGY 1993; 79:A4

Anesthesiology, V 84



## INTERACTION OF ISOFLURANE AND NITROUS OXIDE ON THE EEG

unresponsiveness appears to be supported and may be determined by subcortical structures. In another study, Rampil demonstrated that acute spinal transection at T1 in rats does not change MAC.<sup>‡</sup> Antigonini *et al.* measured MAC in goats and found a large increase in isoflurane requirement (from 1.2 vol% up to 2.9 vol%) when the brain was preferentially anesthetized.<sup>26</sup> They conclude, that subcortical structures modulate movement in response to painful stimuli during general anesthesia.

Quantitative EEG measurement during anesthesia with isoflurane and nitrous oxide at 1.3 and 1.5 MAC showed dose-related dependence.<sup>13</sup> However, comparison of EEG and movement response to noxious stimulation showed no correlation.<sup>27</sup> One conclusion could be that EEG effects and movement response to noxious stimulation are to be regarded as components of anesthesia that result from separate pharmacologic actions.

The potency of nitrous oxide as a substitute for isoflurane for clinical anesthesia in the study of Eger *et al.*<sup>21</sup> is approximately equal to the potency found in this study. This suggests that the use of EEG median frequency better reflects what an attending anesthesiologist considers as clinically appropriate anesthesia, than does the addition of MAC fractions of both agents.

In spite of its analgesic properties,<sup>28</sup> nitrous oxide is known to have only weak anesthetic potency. Due to its high MAC value, it cannot be used effectively as a sole anesthetic at normal atmospheric pressure. This study of its interaction with isoflurane on the EEG indicates that the potency of nitrous oxide as a substitute for isoflurane is less than might be expected from its MAC value. Thus, it might be asked whether nitrous oxide is an essential anesthetic component for inhalational anesthesia with isoflurane.

In conclusion, this study has shown that nitrous oxide in the dose range of 0–75 vol% linearly decreases the requirement of isoflurane needed to maintain median EEG frequency between 2 and 3 Hz. The degree of interaction for this endpoint is, however, less than anticipated from MAC studies, but seems to more appropriately reflect the clinical usage of both drugs.

## References

1. Quasha AL, Eger EI, Tinker JH: Determination and applications of MAC. *ANESTHESIOLOGY* 1980; 53:315–34
2. Saidman LJ, Eger EI: Effect of nitrous oxide and of narcotic premedication on the alveolar concentration of halothane required for anesthesia. *ANESTHESIOLOGY* 1964; 25:302–6
3. Torri G, Damia G, Fabiani ML: Effect of nitrous oxide on the anaesthetic requirement of enflurane. *Br J Anaesth* 1974; 46:468–72
4. Stevens WC, Dolan WM, Gibbons RT, White A, Eger EI, Miller RD, De Jong RH, Elashoff RM: Minimum alveolar concentrations (MAC) of isoflurane with and without nitrous oxide in patients of various ages. *ANESTHESIOLOGY* 1975; 42:197–200
5. DiFazio CA, Brown RE, Ball CG, Heckel CG, Kennedy SS: Additive effects of anesthetics and theories of anesthesia. *ANESTHESIOLOGY* 1972; 36:57–63
6. Cole DJ, Kalichman MW, Shapiro HM: The nonlinear contribution of nitrous oxide at sub-MAC concentrations to enflurane MAC in rats. *Anesth Analg* 1989; 68:556–62
7. Cole DJ, Kalichman MW, Shapiro HM, Drummond JC: The nonlinear potency of sub-MAC concentrations of nitrous oxide in decreasing the anesthetic requirement of enflurane, halothane, and isoflurane in rats. *ANESTHESIOLOGY* 1990; 73:93–9
8. Chortkoff BS, Bennett HL, Eger EI: Does nitrous oxide antagonize isoflurane-induced suppression of learning? *ANESTHESIOLOGY* 1993; 79:724–32
9. Yli-Hankala A, Lindgren L, Porkkala T, Jäntti V: Nitrous oxide-mediated activation of the EEG during isoflurane anaesthesia in patients. *Br J Anaesth* 1993; 70:54–7
10. Deady JE, Koblin DD, Eger EI, Heavner JE, D'Aoust B: Anesthetic Potencies and the Unitary Theory of Narcosis. *Anesth Analg* 1981; 60:380–4
11. Schwilden H, Stoeckel H: Closed-loop feedback controlled administration of alfentanil during alfentanil-nitrous oxide anaesthesia. *Br J Anaesth* 1993; 70:389–93
12. Schwilden H, Stoeckel H: Effective therapeutic infusions produced by closed-loop feedback control of methohexital administration during total intravenous anesthesia with fentanyl. *ANESTHESIOLOGY* 1990; 73:225–9
13. Schwilden H, Stoeckel H: Quantitative EEG analysis during anaesthesia with isoflurane in nitrous oxide at 1.3 and 1.5 MAC. *Br J Anaesth* 1987; 59:738–45
14. Berenbaum MC: What is synergy? *Pharmacol Rev* 1989; 41:93–141
15. Eger EI: Does 1 + 1 = 2? Editorial. *Anesth Analg* 1989; 68:551–2
16. Hornbein TF, Eger EI, Winter PM, Smith G, Wetstone D, Smith KH: The minimum alveolar concentration of nitrous oxide in man. *Anesth Analg* 1982; 61:553–6
17. Shingu K, Osawa M, Fukuda K, Mori K: Acute tolerance to the analgesic action of nitrous oxide does not develop in rats. *ANESTHESIOLOGY* 1985; 62:502–4
18. Dolin SJ, Little HJ: Effects of "nitrendipine" on nitrous oxide anesthesia, tolerance, and physical dependence. *ANESTHESIOLOGY* 1989; 70:91–7
19. Rupprecht J, Dworacek B, Bonke B, Dzoljic MR, van Eijndhoven JHM, de Vlieger M: Tolerance to nitrous oxide in volunteers. *Acta Anaesthesiol Scand* 1985; 29:635–8
20. Avramov MN, Shingu K, Mori K: Progressive changes in electroencephalographic responses to nitrous oxide in humans: A possible acute drug tolerance. *Anesth Analg* 1990; 70:369–74
21. Eger EI, Lampe GH, Wauk LZ, Whitendale P, Cahalan MK,
- ‡ Rampil IJ: Is MAC testing a spinal reflex? (abstract). *ANESTHESIOLOGY* 1993; 79:A422.

Donegan JH: Clinical pharmacology of nitrous oxide: An argument for its continued use. *Anesth Analg* 1990; 71:575-85

22. Dwyer R, Bennett HL, Eger EI, Heilbron D: Effects of isoflurane and nitrous oxide in subanesthetic concentrations on memory and responsiveness in volunteers. *ANESTHESIOLOGY* 1992; 77:888-98

23. Shim CY, Andersen NB: Minimal alveolar concentration (MAC) and dose-response curves in anesthesia. *ANESTHESIOLOGY* 1972; 36:146-51

24. Kissin I: General anesthetic action: An obsolete notion? Editorial. *Anesth Analg* 1993; 76:215-8

25. Rampil IJ, Mason P, Singh H: Anesthetic potency (MAC) is

independent of forebrain structures in the rat. *ANESTHESIOLOGY* 1993; 78:707-12

26. Antigonini JF, Schwartz K: Exaggerated anesthetic requirements in the preferentially anesthetized brain. *ANESTHESIOLOGY* 1993; 79:1244-9

27. Rampil IJ, Laster MJ: No correlation between quantitative electroencephalographic measurements and movement response to noxious stimuli during isoflurane anesthesia in rats. *ANESTHESIOLOGY* 1992; 77:920-5

28. Komatsu T, Shingu K, Tomemori M, Urabe N, Mori K: Nitrous oxide activates the supraspinal pain inhibition system. *Acta Anaesthesiol Scand* 1981; 25:519-22

## Long-term Treatment without A Undergo

Marc Licker, M.D.,\*  
Tshibambula Kalonji

**Background:** The sin systems are involved in known to be marked by cause unexpected h repeatedly during an angiotensin-converting questioned whether alter the hemodynamic endocrine responses the pressor effects

**Methods:** Patient undergoing mitral valve replacement were divided into two groups: one receiving drug therapy for 3 months (ACEI group) and the other receiving divascular drug therapy. Dynamic variables were measured during anesthesia induction, and after aortic valve replacement, cardiopulmonary was sampled repeatedly for analysis. To test the effect of norepinephrine on thermic CPB and response curves, and changes), and va

\* Research Fellow

† Staff Anesthesiologist

‡ Professor, Division

§ Staff Surgeon, Cardio

|| Biologist, Laboratory

# Associate Professor

Received from the

University Hospital

publication August

7, 1995. The angiotensin

Hoffmann-La Roche

Address reprint requests to

Hôpital Cantonal Universitaire

Anesthesiology, V 84, No 4, Apr 1996
